# Supplementary material for: Assessing Bladder Cancer Risk in Type 2 Diabetes Clinical Trials: the Dapagliflozin Drug Development Program as a ‘Case Study’
Source: PubMed Central journal article supplement — Diabetes Ther. 2015 Sep 1;6(3):357–75. doi: 10.1007/s13300-015-0128-9 (PMC4575305; doi:10.1007/s13300-015-0128-9), 2015-09-01
Supplement: 13300_2015_128_MOESM2_ESM.pdf [file 13300_2015_128_MOESM2_ESM.pdf]

**Supplementary Table S1. Studies analyzed.**

CV=cardiovascular, GFR=glomerular filtration rate, HCTZ=hydrocholothiazide, metformin-XR=metformin extended release, OAD=oral antidiabetic drug, TZD=thiazolidinedione.

| <b>Study</b>                                                            | <b>Duration analyzed, weeks</b> | <b>Treatment arms</b>                                                               | <b>Background therapy</b>                       |
|-------------------------------------------------------------------------|---------------------------------|-------------------------------------------------------------------------------------|-------------------------------------------------|
| Phase 2 dose-range monotherapy                                          | 12                              | Dapagliflozin 2.5, 5, 10, 20, 50 mg, placebo, metformin-XR 750/1500 mg              | Treatment-naïve                                 |
| Phase 2 monotherapy (Japanese population)                               | 12                              | Dapagliflozin 1, 2.5, 5, 10 mg, placebo                                             | Treatment-naïve                                 |
| Phase 2 add-on to metformin, Effect on GFR                              | 12                              | Dapagliflozin 10 mg, HCTZ 25 mg, or placebo                                         | Metformin ± sulphonylurea                       |
| Phase 2 add-on to metformin ± insulin secretagogue, Insulin sensitivity | 12                              | Dapagliflozin 5 mg, placebo                                                         | Metformin ± insulin secretagogue                |
| Phase 3 monotherapy (Japanese population)                               | 24                              | Dapagliflozin 5, 10 mg, placebo                                                     | Treatment-naïve                                 |
| Low dose monotherapy                                                    | 24                              | Dapagliflozin 1, 2.5, 5 mg                                                          | Treatment-naïve                                 |
| Phase 3 monotherapy                                                     | 24 + 78                         | Dapagliflozin 2.5, 5, 10 mg, placebo                                                | Treatment-naïve                                 |
| Phase 3 Asia monotherapy                                                | 24                              | Dapagliflozin 5, 10 mg, placebo                                                     | Treatment-naïve                                 |
| Add-on to metformin                                                     | 24 + 78                         | Dapagliflozin 2.5, 5, 10 mg, placebo                                                | Metformin ≥1500 mg/day                          |
| Add-on to metformin, (Primary endpoint – body weight)                   | 24 +78                          | Dapagliflozin 10 mg, placebo                                                        | Metformin ≥1500 mg/day                          |
| Initial combination with metformin                                      | 24                              | Dapagliflozin 5 mg + metformin-XR, Dapagliflozin 5 mg, metformin-XR up to 2000 mg   | Treatment-naïve                                 |
| Initial combination with metformin                                      | 24                              | Dapagliflozin 10 mg + metformin-XR, Dapagliflozin 10 mg, metformin-XR up to 2000 mg | Treatment-naïve                                 |
| Add-on to metformin vs glipizide                                        | 52 + 52 + 104                   | Dapagliflozin 2.5, 5, 10 mg, glipizide                                              | Metformin ≥ 1500 mg/day                         |
| Add-on to sulphonylurea                                                 | 24 + 24                         | Dapagliflozin 2.5, 5, 10 mg, placebo                                                | Glimepiride 4 mg/day                            |
| Add-on to TZD                                                           | 24 + 24                         | Dapagliflozin 5, 10 mg, placebo                                                     | Pioglitazone 30 or 45 mg/day                    |
| Add-on to sitagliptin                                                   | 24 + 24                         | Dapagliflozin 10 mg, placebo                                                        | Sitagliptin 100 mg/day ± metformin ≥1500 mg/day |

|                                   |              |                                      |                                                           |
|-----------------------------------|--------------|--------------------------------------|-----------------------------------------------------------|
| Add-on to insulin                 | 12           | Dapagliflozin 10, 20 mg, placebo     | Insulin sensitizers (metformin ± TZDs) + 50% original INS |
| Add-on to insulin                 | 24 + 24 + 56 | Dapagliflozin 2.5, 5, 10 mg, placebo | Insulin ≥30 IU/day ± maximum 2 OADs                       |
| High CV risk add-on to usual care | 24 + 28 + 52 | Dapagliflozin 10 mg, placebo         | OADs ± insulin                                            |
| High CV risk add-on to usual care | 24 + 28 + 52 | Dapagliflozin 10 mg, placebo         | OADs ± insulin                                            |
| Moderate renal impairment         | 24 + 28 + 52 | Dapagliflozin 5, 10 mg, placebo      | Any except metformin                                      |
