# Supplementary material for: Assessing Bladder Cancer Risk in Type 2 Diabetes Clinical Trials: the Dapagliflozin Drug Development Program as a ‘Case Study’
Source: Springer Nature journal article supplement (doi:10.1007/s13300-015-0128-9), 2015-08-31
Supplement: MOESM1 [file 9263362]

- We review data in >9,000 patients included in 21 phase 2b/3 dapagliflozin clinical trials of up to 208 weeks' duration, to illustrate the challenges in assessing the effects of glucose-lowering drugs on bladder cancer.
- Overall, 9/5,936 dapagliflozin-treated patients and 1/3,403 comparator-treated patients reported bladder cancer (incidence rate ratio 5.168, 95% confidence interval: 0.677, 233.55); all within 2 years of starting the study.
- Of the nine dapagliflozin-treated patients with bladder cancer, eight had microscopic hematuria prior to or within 6 months of study start.
- Evidence to date does not suggest a causal relationship between dapagliflozin and bladder cancer; our manuscript illustrates how diagnostic latency and inconsistency in adherence to guidelines for bladder cancer detection, even in a higher risk population, can lead to potential detection biases.
- Any firm conclusion cannot be made without additional clinical data, and as such, bladder cancer events are being carefully investigated in ongoing trials of dapagliflozin.

This summary slide represents the opinions of the authors. Sponsorship for this study was funded by AstraZeneca. Medical writing assistance for this study was provided by Shelley Narula and Mark Davies of inScience Communications, Springer Healthcare Ltd, funded by AstraZeneca. For a full list of acknowledgments and conflicts of interest for all authors of this article, please see the full text online. Copyright © The Author(s) 2015. Creative Commons Attribution Noncommercial License (CC BY-NC).
